# Supplementary material for: Apatinib weakens proliferation, migration, invasion, and angiogenesis of thyroid cancer cells through downregulating pyruvate kinase M2
Source: Springer Nature journal article supplement (doi:10.1038/s41598-023-50369-w), 2024-01-09
Supplement: MOESM1 [file 41598_2023_50369_MOESM1_ESM.pdf]

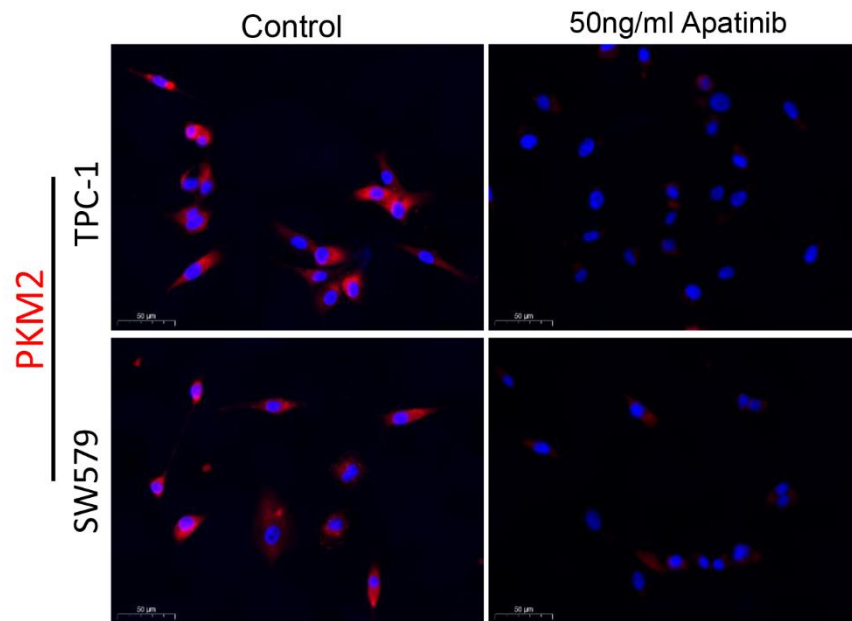

**Supplementary Fig 1. The change in PKM2 expression was examined through IF staining in SW579 and TPC-1 cells after treatment with 50 ng/ml Apatinib. Magnification, 200×.**
